# Supplementary material
Source: PubMed Central journal article supplement (PMC4581609)
Supplement: supp_ddv307_ddv307supp.pdf [file supp_ddv307_ddv307supp.pdf]

## **Supplemental Materials**

### **Altering 5-hydroxymethylcytosine modification impacts ischemic brain injury**

Zhigang Miao<sup>1,2#</sup>, Yuquan He<sup>3#</sup>, Ning Xin<sup>1</sup>, Miao Sun<sup>5</sup>, Li Chen<sup>4</sup>, Li Lin<sup>4</sup>, Jizhen Li<sup>1,6</sup>, Jiming Kong<sup>6</sup>, Peng Jin<sup>4,\*</sup>, Xingshun Xu<sup>1,2,\*</sup>

**Supplemental Figure 1. The Tet2 inhibitor SC1 reduced Tet2 expression.** (A) RT-PCR analysis of the mRNA levels of Tet2 in mouse brain after treatment with SC1. (B) Dot blotting analysis with anti-5hmC. \*\*\* $P < 0.001$

**Supplemental Figure 2.** Representative genes of 5hmC after stroke. Differential 5hmC distributions on gene bodies were visualized by IGV browser. ZRF-1, SOSC-3, HO-1, Galanin, Caspase3, and APP showed higher 5hmC abundance after stroke, while VGAT, SNAP-25B, TIMP-1, HIP-1, CNTF, and GluR3 showed lower 5hmC abundance.

**Supplemental Table 1. Correlation analysis of 5hmC abundance and gene expression after stroke.** Gene expressions after stroke in the literature and 5hmC abundance in genes were compared in this study. Up means increase; down means decrease or unchanged.

**Supplemental Table 2. Correlation analysis of 5hmC abundance and lncRNA after stroke.** Gene expressions of lncRNA after stroke in the literature and 5hmC abundance on the genes encoding lncRNA were compared. Up means increase; down means decrease or unchanged.

**Supplemental Table 3. Primer sequences for quantitative PCR.** The primers of GAPDH, BDNF, Tet1, Tet2, and Tet3 are listed.

## Supplemental Figure 1

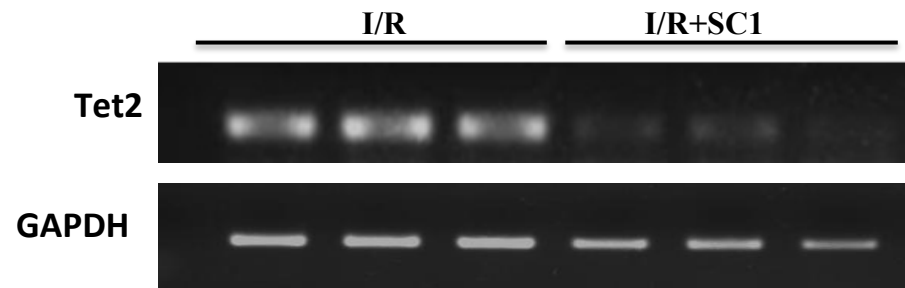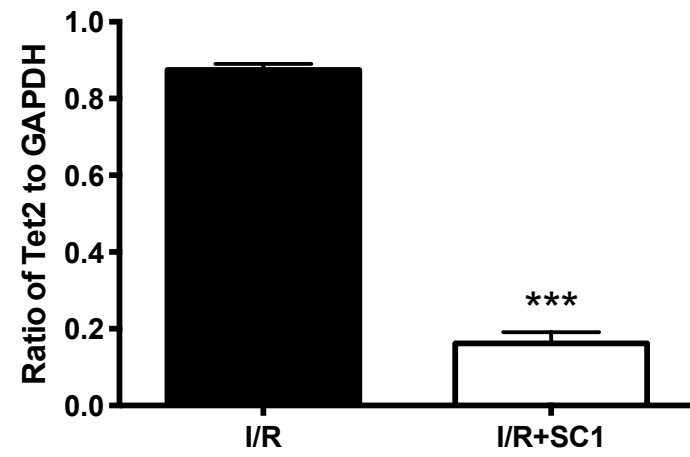

## Supplemental Figure 2

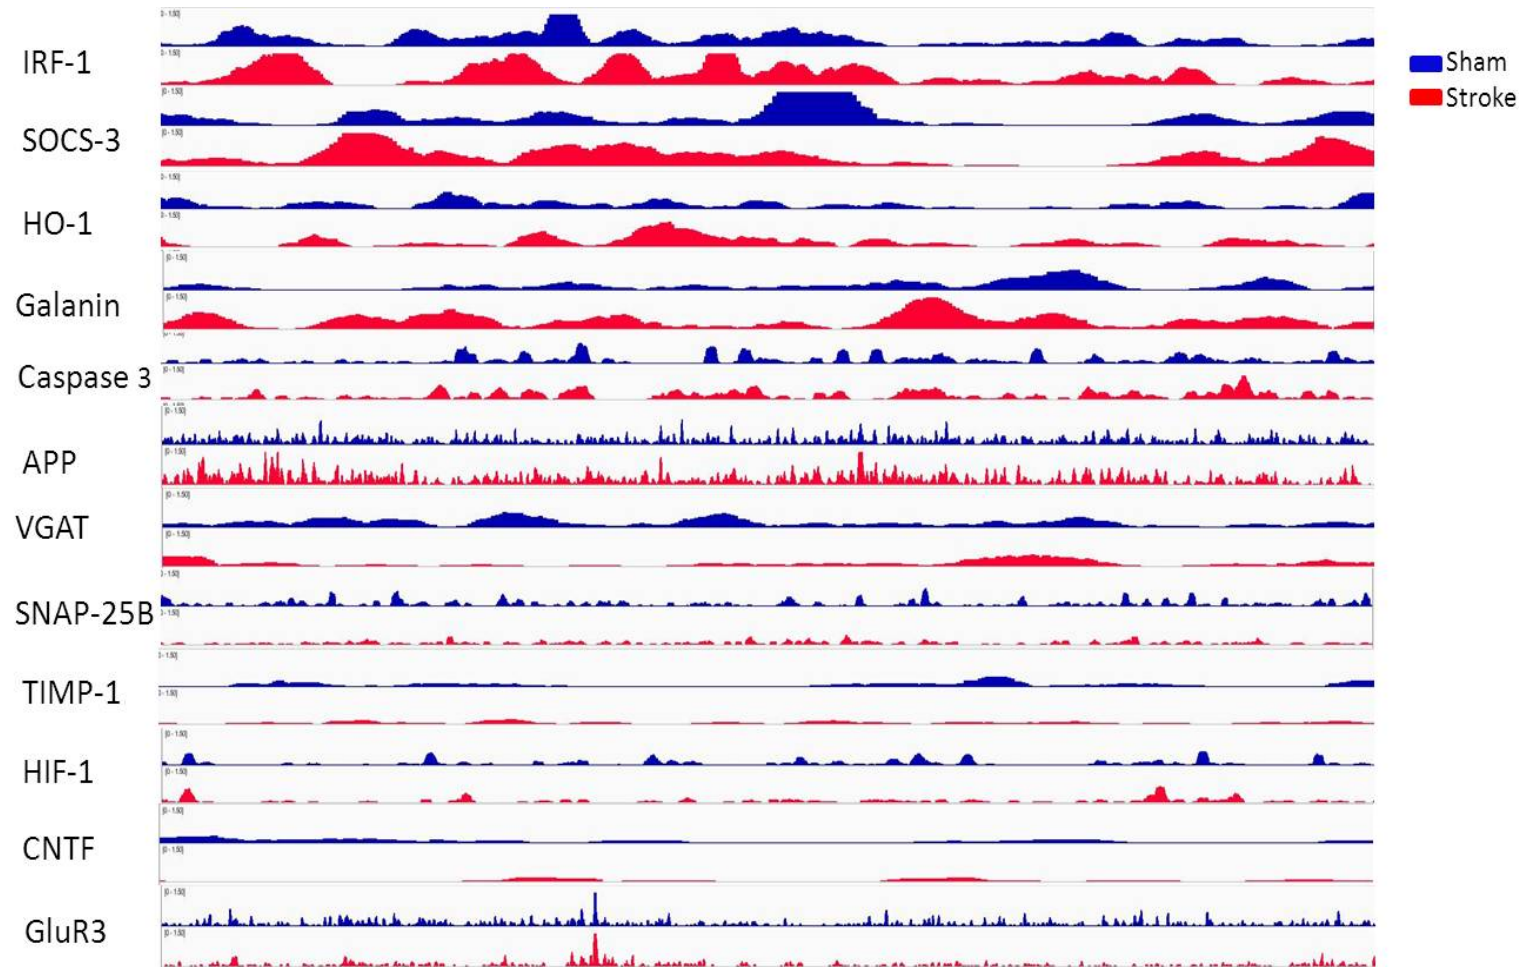

**Supplemental Table 1. Correlation analysis of 5hmC abundance and gene expression after Stroke**

| <b>Gene</b>                   | <b>Expression after Stroke</b> | <b>5hmC after Stroke</b> | <b>Gene</b>                    | <b>Expression after Stroke</b> | <b>5hmC after Stroke</b> |
|-------------------------------|--------------------------------|--------------------------|--------------------------------|--------------------------------|--------------------------|
| <i>Casp3</i> <sup>[18]</sup>  | Up                             | Up                       | <i>Gja1</i>                    | Up                             | Up                       |
| <i>Gdnf</i> <sup>[20]</sup>   | Up                             | Up                       | <i>Parp1</i>                   | Up                             | Up                       |
| <i>Bdnf</i> <sup>[19]</sup>   | Up                             | Up                       | <i>Mlkl</i>                    | Up                             | Up                       |
| <i>Vegfa</i> <sup>[21]</sup>  | Up                             | Up                       | <i>Rbp1</i>                    | Unclear                        | Up                       |
| <i>Lif</i> <sup>[23]</sup>    | Up                             | Up                       | <i>Icam1</i>                   | Down                           | Down                     |
| <i>Hmox1</i> <sup>[17]</sup>  | Up                             | Up                       | <i>Grm3</i> <sup>[17]</sup>    | Down                           | Down                     |
| <i>Socs3</i> <sup>[17]</sup>  | Up                             | Up                       | <i>Slc32a1</i> <sup>[17]</sup> | Down                           | Down                     |
| <i>Sod2</i>                   | Up                             | Up                       | <i>Snap25</i> <sup>[17]</sup>  | Down                           | Down                     |
| <i>Irf1</i> <sup>[17]</sup>   | Up                             | Up                       | <i>Slc8a1</i> <sup>[28]</sup>  | Down                           | Down                     |
| <i>Ccl3</i> <sup>[30]</sup>   | Up                             | Up                       | <i>Tgfb1</i> <sup>[29]</sup>   | Down                           | Down                     |
| <i>Hspa1b</i> <sup>[17]</sup> | Up                             | Up                       | <i>Crem</i> <sup>[17]</sup>    | Up                             | Down                     |
| <i>Gal</i> <sup>[17]</sup>    | Up                             | Up                       | <i>Cntf</i> <sup>[22]</sup>    | Up                             | Down                     |
| <i>Ccl2</i> <sup>[24]</sup>   | Up                             | Up                       | <i>Timp1</i> <sup>[26]</sup>   | Up                             | Down                     |
| <i>Nos2</i> <sup>[25]</sup>   | Up                             | Up                       | <i>Hif1a</i> <sup>[27]</sup>   | Up                             | Down                     |
| <i>Mmp9</i> <sup>[26]</sup>   | Up                             | Up                       | <i>Il6</i> <sup>[17]</sup>     | Up                             | Down                     |
| <i>App</i>                    | Up                             | Up                       | <i>Ptgs2</i> <sup>[25]</sup>   | Up                             | Down                     |
| <i>Cst3</i>                   | Up                             | Up                       |                                |                                |                          |

**Supplemental Table 2 . Correlation analysis and 5hmC abundance and lncRNA expression after Stroke <sup>[31]</sup>**

| <b>lnc ID</b> | <b>Pubmed ID</b> | <b>Mimicked Gene</b> | <b>Change after stroke</b> | <b>5hmc after stroke</b> |
|---------------|------------------|----------------------|----------------------------|--------------------------|
| MRAK077719    | 499497           | Mef2c                | Up                         | Down                     |
| XR_006073     | 362726           | Atxn7l4              | Up                         | Down                     |
| U77626        | 361029           | Ktn1                 | Up                         | Down                     |
| BC158779      | 501747           | Qrich2               | Down                       | Up                       |
| uc.236        | 306254           | Pbrm1                | Down                       | Down                     |
| S39217        | 311029           | Neb                  | Down                       | Down                     |
| MRAK079854    | 671517           | Megf11               | Up                         | None                     |
| MRAK078894    | 29715            | Slc8a1               | Up                         | Down                     |
| XR_008501     | 63881            | Ragef1               | Up                         | Up                       |
| XR_009527     | 100912235        | Mast4                | Up                         | None                     |
| BC086373      | 501546           | Huwe1                | Down                       | Down                     |
| BC103647      | 363767           | Abi3bp               | Down                       | Down                     |
| uc.308-       | 686098           | Sorbs1               | Down                       | None                     |
| uc.408+       | 498952           | Zfp1                 | Down                       | Down                     |
| MRAK159688    | 022197           | Fos                  | Up                         | Up                       |

**Supplemental Table 3. Primer sequences for quantitative RT-PCR**

| Primer        | Sequences                                  |
|---------------|--------------------------------------------|
| Gapdh forward | 5'-CAT GGC CTT CCG TGT TCC TA-3'           |
| Gapdh reverse | 5'-CTT CAC CAC CTT CTT GAT GTC ATC-3'      |
| Tet1 forward  | 5'-CCA GGA AGA GGC GACTAC GTT-3'           |
| Tet1 reverse  | 5'-TTA GTG TTG TGTGAA CCT GAT TTA TTG T-3' |
| Tet2 forward  | 5'-ACT TCT CTG CTC ATT CCC ACA GA-3'       |
| Tet2 reverse  | 5'-TTA GCT CCG ACT TCT CGA TTG TC-3'       |
| Tet3 forward  | 5'-GAG CAC GCC AGA GAA GAT CAA-3'          |
| Tet3 reverse  | 5'-CAG GCT TTG CTG GGA CAA TC-3'           |
| BDNF forward  | 5'-GCCTCCTCTACTCTTTCTGC-3'                 |
| BDNF reverse  | 5'-ATGGGATTACACTTGGTCTC-3'                 |
